# Supplementary material for: Selective synthesis of two-dimensional semiconductive coordination polymers with silver–sulfur network
Source: Royal Society of Chemistry journal article supplement (doi:10.1039/d3ce00106g), 2023-01-01
Supplement: d3ce00106g1.pdf [file d3ce00106g1.pdf]

## Supporting Information

### Selective synthesis of two-dimensional semiconductive coordination polymers with silver–sulfur network

Ryohei Akiyoshi,<sup>a</sup> Akinori Saeki,<sup>b</sup> Kazuyoshi Ogasawara,<sup>a</sup> Hirofumi Yoshikawa,<sup>c</sup> Yuiga Nakamura,<sup>d</sup> and Daisuke Tanaka\*<sup>a</sup>

<sup>a</sup> Department of Chemistry, School of Science, Kwansei Gakuin University, 1 Gakuen Uegahara, Sanda, Hyogo 669-1330, Japan

<sup>b</sup> Department of Applied Chemistry, Graduate School of Engineering, Osaka University, 2-1 Yamadaoka, Suita, Osaka 565-0871, Japan

<sup>c</sup> Department of Nanotechnology for Suitable Energy, School of Engineering, Kwansei Gakuin University, 1 Gakuen Uegahara, Sanda, Hyogo 669-1330, Japan

<sup>d</sup> Japan Synchrotron Radiation Research Institute (JASRI), 1-1-1 Kouto, Sayo-cho, Sayo-gun, Hyogo 679-5198, Japan

Email: dtanaka@kwansei.ac.jp

## Table of Contents

### Experimental Section

|                                                                                              |       |
|----------------------------------------------------------------------------------------------|-------|
| Materials .....                                                                              | S3    |
| Syntheses .....                                                                              | S3    |
| Methods.....                                                                                 | S3, 4 |
| <br>                                                                                         |       |
| <b>Fig. S1.</b> SEM textures.....                                                            | S5    |
| <b>Table S1.</b> Crystallographic data .....                                                 | S5    |
| <b>Fig. S2.</b> Asymmetric unit .....                                                        | S6    |
| <b>Fig. S3.</b> Structure around Ag(I) center .....                                          | S6    |
| <b>Fig. S4.</b> Packing structure of 2D layer.....                                           | S6    |
| <b>Fig. S5.</b> Experimental and simulated PXRD patterns .....                               | S7    |
| <b>Fig. S6.</b> TG analyses.....                                                             | S7    |
| <b>Fig. S7.</b> PXRD patterns after thermal decomposition .....                              | S8    |
| <b>Fig. S8.</b> PYS results.....                                                             | S8    |
| <b>Table S2.</b> List of TRMC results for photoconductive S-CPs .....                        | S9    |
| <b>Fig. S9.</b> Excitation intensity dependence of TRMC experiments for <b>KGF-24</b> .....  | S9    |
| <b>Fig. S10.</b> Excitation intensity dependence of TRMC experiments for <b>KGF-25</b> ..... | S10   |
| <b>Fig. S11.</b> Distribution of VBM and CBM for <b>KGF-24</b> .....                         | S10   |
| <b>Fig. S12.</b> Distribution of VBM and CBM for <b>KGF-25</b> .....                         | S10   |
| <br>                                                                                         |       |
| Reference .....                                                                              | S11   |

## Experimental

### Materials

CF<sub>3</sub>COOAg (≥97.0%), 1,3-thiazolidine-2-thione (Htzdt) (≥95.0%), acetone (≥99.0%), and methanol (≥99.5%) were obtained from Fujifilm Wako Pure Chemical Industries, Osaka, Japan. All chemicals and solvents employed in syntheses were of reagent grade and were used without further purification.

### Synthesis

#### [Ag(tzdt)]<sub>n</sub> (KGF-24)

CF<sub>3</sub>COOAg (132.5 mg, 0.6 mmol) and Htzdt (71.5 mg, 0.6 mmol) were dissolved in acetone (8.0 mL) and sealed in a 16-mL autoclave. The solution was heated to 80 °C for 48 h. Then, the container was cooled to 30 °C for 12 h. The residue was collected by centrifugation (4800 rpm, 5 min), followed by washing with acetone and methanol in turn. The resulting solid was dried under vacuum to obtain the product as colorless plate crystals (65.6 mg, 48.4%). Anal. C<sub>3</sub>H<sub>4</sub>AgNS<sub>2</sub>: calcd. C 15.94, H 1.78, N 6.20; found. C 15.94, H 1.79, 6.02.

#### [Ag<sub>2</sub>(tzdt)(TFA)]<sub>n</sub> (KGF-25)

**KGF-25** was synthesized from CF<sub>3</sub>COOAg (265.1 mg, 1.2 mmol) and Htzdt (71.5 mg, 0.6 mmol) using the same procedure as that used for **KGF-24**. The product was collected as colorless plate crystals (89.6 mg, 33.4%). Anal. C<sub>5</sub>H<sub>4</sub>Ag<sub>2</sub>F<sub>3</sub>NO<sub>2</sub>S<sub>2</sub>: calcd. C 13.44, H 0.90, N 3.13; found. C 13.67, H 0.79, N 3.12.

### Methods

#### Elemental analysis

Elemental analysis was performed by A-Rabbit-Science Japan Co., Ltd.

#### Single crystal X-ray diffraction (SCXRD) measurement

SCXRD data for **KGF-24** were collected on a Hybrid Pixel Array Detector with synchrotron radiation ( $\lambda = 0.41420 \text{ \AA}$ ) at the BL02B1 beamline of the SPring-8 synchrotron radiation facility. The SCXRD data for **KGF-25** were collected on a Rigaku Saturn CCD diffractometer with Mo-*K* $\alpha$  radiations ( $\lambda = 0.71075 \text{ \AA}$ ). The diffraction profiles were integrated using the CrysAlisPro software. The crystal data were solved by directed methods using the SHELXT program and refined with SHELXL.<sup>1,2</sup> Anisotropic thermal parameters were used to refine all non-H atoms. All calculations were conducted using the Olex2 crystallographic software package.<sup>3</sup>

#### Powder X-ray diffraction (PXRD) measurement

PXRD patterns were obtained on a Rigaku MiniFlex600 diffractometer at 40 kV and 15 mA using

a Cu-target tube. The samples were examined without grinding, and the data were collected in the 2–50° 2 $\theta$  range using Cu-K $\alpha$  radiation ( $\lambda = 1.54187 \text{ \AA}$ ).

### **Thermogravimetric (TG) analysis**

TG analyses were performed on a Shimadzu DTG-60 instrument in the temperature range 30–500 °C at 10 °C min<sup>-1</sup> under N<sub>2</sub> atmosphere.

### **Diffuse-reflectance ultraviolet–visible–near-infrared (DR–UV–Vis–NIR) spectroscopy**

DR–UV–Vis–NIR spectroscopy was performed using a SHIMADZU UV-3600 UV–Vis–NIR spectrophotometer from 200 to 600 nm. BaSO<sub>4</sub> powder was used as a non-adsorbing background. The bandgaps were calculated through the Kubelka–Munk (KM) function using the following equation:

$$\frac{K}{S} = F(R) = \frac{(1 - R)^2}{2R}$$

where  $K$  is the absorption coefficient,  $S$  is a scattering factor,  $R$  is the reflectance, and  $F(R)$  is the KM function. The band gap was determined from the Tauc plot with  $[F(R) \times hv]^{1/2}$  vs.  $hv$  by extrapolating the linear region to the abscissa.

### **Time-resolved microwave conductivity (TRMC) measurement**

Crystalline samples on adhesive tape on a quartz substrate were set in a resonant cavity and probed using continuous microwave radiation at ~9.1 GHz. The third harmonic generation (THG; 355 nm) of a Nd:YAG laser (Continuum Inc., Surelite II, 5–8 ns pulse duration, 10 Hz) was used as the excitation source (incident photon density  $I_0 = 9.1 \times 10^{15} - 4.6 \times 10^{14} \text{ photons cm}^{-2} \text{ pulse}^{-1}$ ).

### **Photoelectron yield spectroscopy (PYS)**

Crystalline samples on a conductive carbon tape were subjected to PYS using a Bunko Keiki BIP-KV202GD instrument.

### **First-principles calculation**

First-principles calculations were performed using CASTEP 2020 (20.1.0.5). We calculated the band structure and density of state using the generalized gradient approximation functional proposed by Perdew, Burke, and Ernzerhof (PBE) for the exchange correlation potential. Atomic positions were relaxed to enable minimization of the potential energy. The energy tolerance for the electronic structure calculations was  $5 \times 10^{-7}$  eV, and that for ionic relaxation was  $5 \times 10^{-6}$  eV. The pseudopotential plane-wave method was ultrasoft in PBE, the plane-wave cut-off was set to 570 eV for **KGF-24** and 630 eV for **KGF-25**, and the Brillouin zone was sampled with a  $5 \times 8 \times 6$   $k$ -point mesh for **KGF-24** and  $4 \times 5 \times 7$   $k$ -point mesh for **KGF-25**.

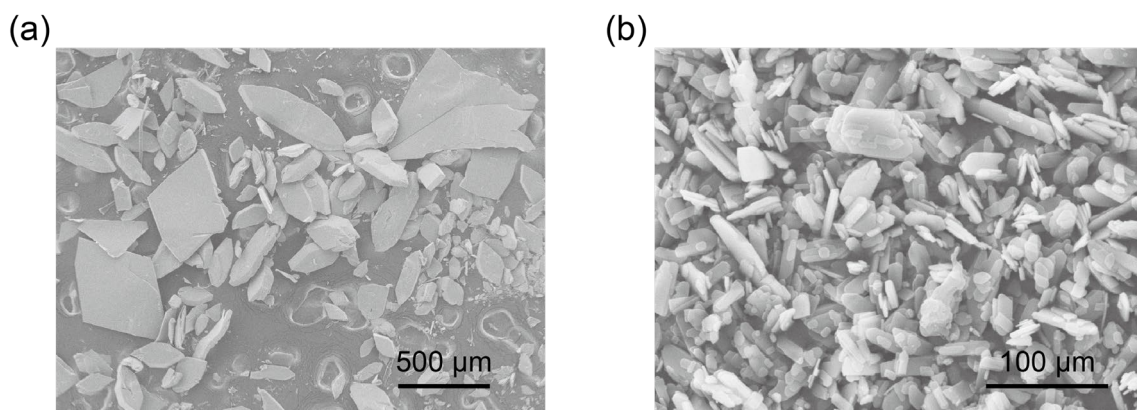

**Fig. S1.** SEM images showing textures of (a) **KGF-24** and (b) **KGF-25**.

**Table S1.** Crystallographic data for **KGF-24** and **KGF-25**.

| Compound                                | <b>KGF-24</b>  | <b>KGF-25</b>          |
|-----------------------------------------|----------------|------------------------|
| Formula                                 | $C_3H_4AgNS_2$ | $C_5H_4Ag_2F_3NO_2S_2$ |
| Formula weight                          | 226.06         | 446.95                 |
| $T / K$                                 | 150            | 150                    |
| Crystal system                          | Monoclinic     | Monoclinic             |
| Space group                             | $P2_1/c$       | $P2_1/c$               |
| $a / \text{Å}$                          | 11.1792 (3)    | 12.4028 (3)            |
| $b / \text{Å}$                          | 6.3833 (1)     | 10.0914 (3)            |
| $c / \text{Å}$                          | 7.9535 (2)     | 7.3468 (2)             |
| $\alpha / \text{deg}$                   | 90             | 90                     |
| $\beta / \text{deg}$                    | 104.230 (3)    | 91.801 (2)             |
| $\gamma / \text{deg}$                   | 90             | 90                     |
| $V / \text{Å}^3$                        | 550.15 (2)     | 919.08 (4)             |
| $Z$                                     | 4              | 4                      |
| $\rho_{\text{calc}} / \text{g cm}^{-3}$ | 2.729          | 3.230                  |
| $\mu / \text{mm}^{-1}$                  | 5.084          | 4.737                  |
| $F_{000}$                               | 432.0          | 840.0                  |
| $R_1 (I > 2\sigma(I))$                  | 0.0487         | 0.0357                 |
| $R_1$ (all data)                        | 0.0495         | 0.0463                 |
| $wR_2 (I > 2\sigma(I))$                 | 0.1439         | 0.0841                 |
| $wR_2$ (all data)                       | 0.1451         | 0.0918                 |
| GOF                                     | 1.101          | 1.031                  |
| CCDC number                             | 2236352        | 2236353                |

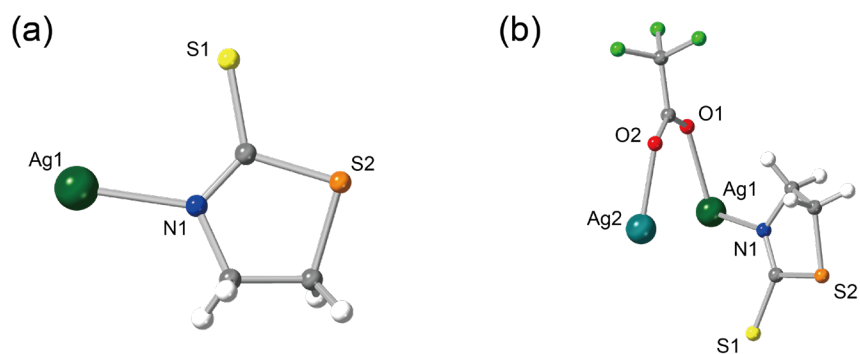

**Fig. S2.** Asymmetric unit of (a) **KGF-24** and (b) **KGF-25**. Color code: Ag1; dark green, Ag2; light green, S1; yellow, S2; orange, N; blue, C; grey, F; green, H; white.

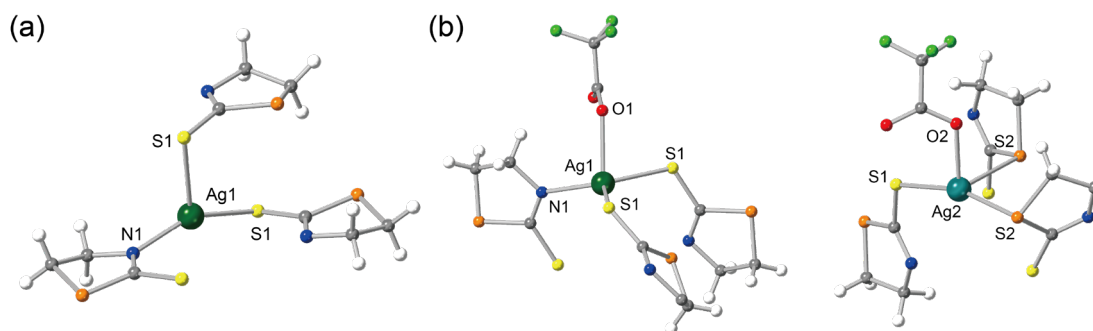

**Fig. S3.** Structures around Ag(I) center of (a) **KGF-24** and (b) **KGF-25**.

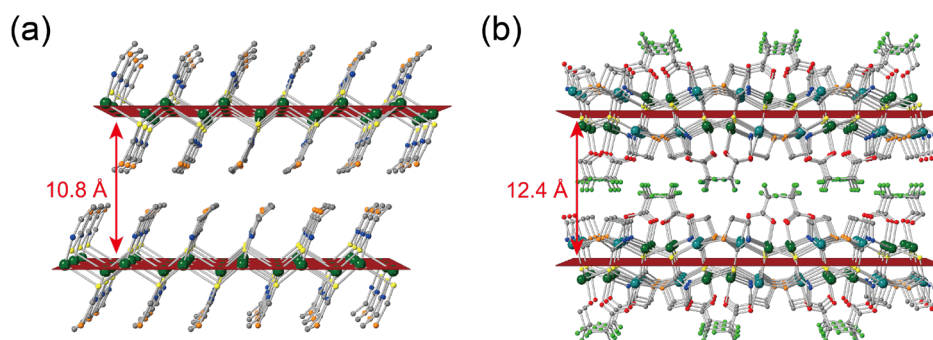

**Fig. S4.** Packing structures of 2D layers indicating interlayer distance for (a) **KGF-24** and (b) **KGF-25**.

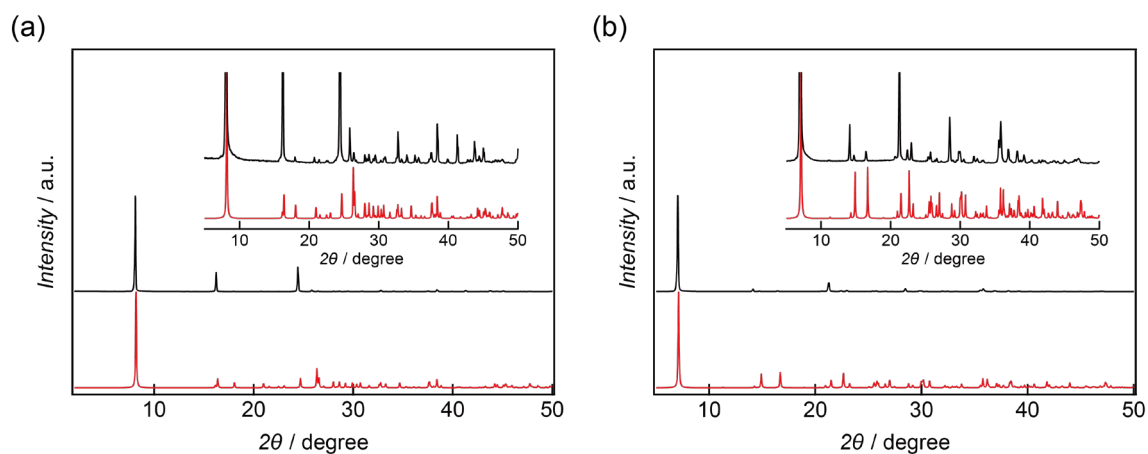

**Fig. S5.** PXR pattern of (a) **KGF-24** and (b) **KGF-25**. Inset shows enlarged PXR pattern (red: simulation pattern obtained from SCXRD, black: experimental pattern).

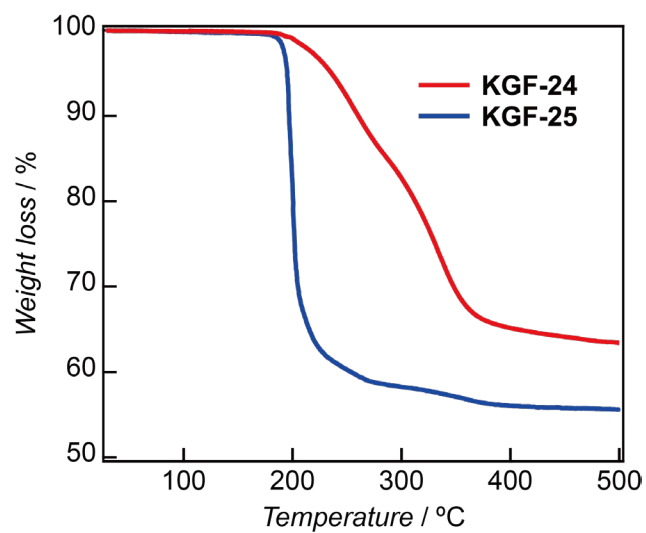

**Fig. S6.** TG results for **KGF-24** (red) and **KGF-25** (blue) in the temperature range 30–500 °C.

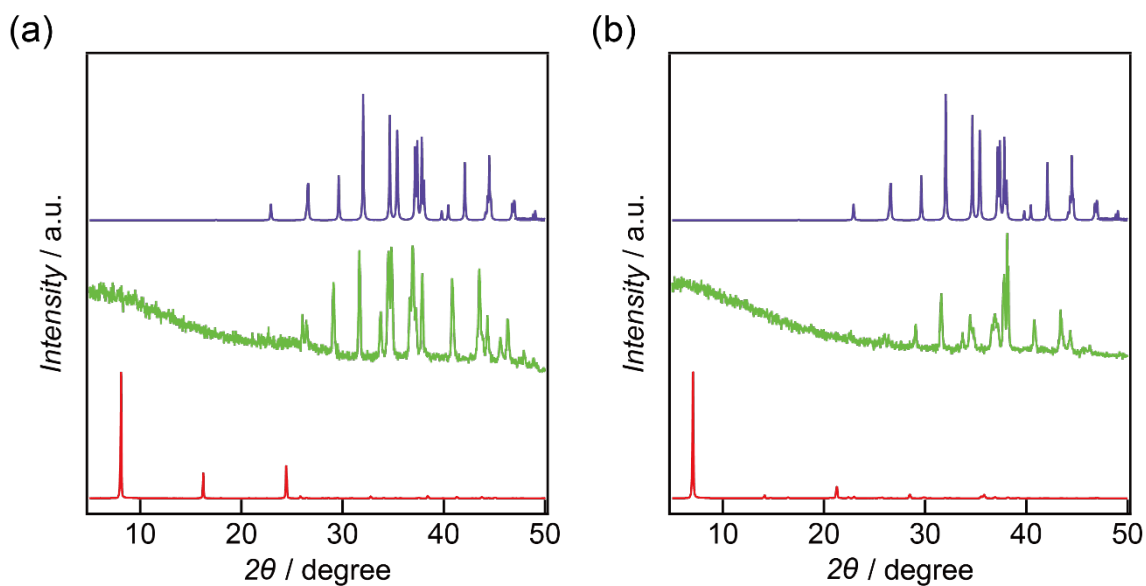

**Fig. S7.** PXR D pattern of (a) **KGF-24** and (b) **KGF-25** after heating to 500 °C (red: as-synthesized, green: products after decomposition, purple: simulation pattern for Ag<sub>2</sub>S).

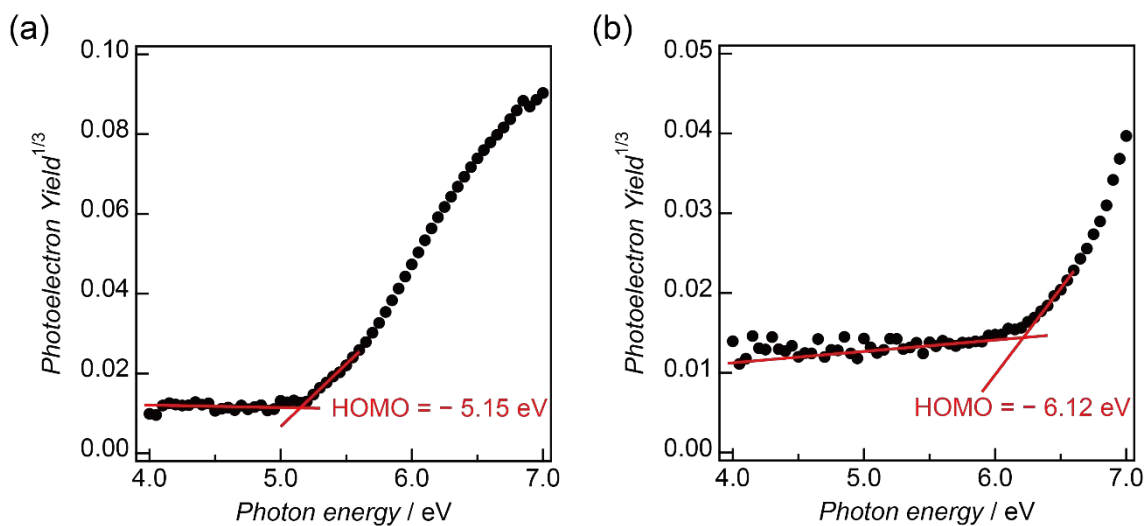

**Fig. S8.** PYS results of (a) **KGF-24** and (b) **KGF-25**.



**Table S2.** List of TRMC results for photoconductive CPs and MOFs.

| Compound                                                                     | $\phi\Sigma\mu_{\max} / \text{cm}^2 \text{V}^{-1} \text{s}^{-1}$ | Reference |
|------------------------------------------------------------------------------|------------------------------------------------------------------|-----------|
| $[\text{Pb}_3\text{ttc}_2 \cdot 2\text{H}_2\text{O}]_n$                      | $7.4 \times 10^{-5}$                                             | S4        |
| $[\text{Pb}(\text{tadt})]_n$                                                 | $4.9 \times 10^{-5}$                                             | S5        |
| $[\text{Sn}_2(\text{Httc})_2 \cdot \text{MeOH}]_n$                           | $1.8 \times 10^{-5}$                                             | S6        |
| $[\text{Ag}_2\text{Httc}]_n$                                                 | $1.6 \times 10^{-4}$                                             | S7        |
| $[\text{AgH}_2\text{ttc}]_n$                                                 | $2.7 \times 10^{-5}$                                             | S7        |
| $[\text{Ag}_3\text{ttc}]_n$                                                  | $2.8 \times 10^{-5}$                                             | S7        |
| $\text{Mn}_2(\text{DSBDC})$                                                  | $2.0 \times 10^{-5}$                                             | S8        |
| $\text{Cu}_4^{\text{I}}\text{Cu}_2^{\text{II}}\text{Br}_4(\text{pyr-dtc})_4$ | $9.0 \times 10^{-5}$                                             | S9        |
| $\text{Zn}_2(\text{TTFTB})$                                                  | $3.0 \times 10^{-5}$                                             | S10       |
| $\text{H}_4\text{TTFTB}$                                                     | $9.0 \times 10^{-6}$                                             | S10       |
| $[\text{Ag}(\text{tzdt})]_n$ ( <b>KGF-24</b> )                               | $3.6 \times 10^{-5}$                                             | This work |
| $[\text{Ag}(\text{tzdt})(\text{TFA})]_n$ ( <b>KGF-25</b> )                   | $2.2 \times 10^{-5}$                                             | This work |

H<sub>3</sub>ttc: trithiocyanuric acid; H<sub>2</sub>tadt: 1,3,4-thiadiazole-2,5-dithiol; H<sub>4</sub>DSBDC: 2,5-disulphydrylbenzene-1,4-dicarboxylic acid; TTFTB: tetrathiafulvalene-tetrabenzoate.

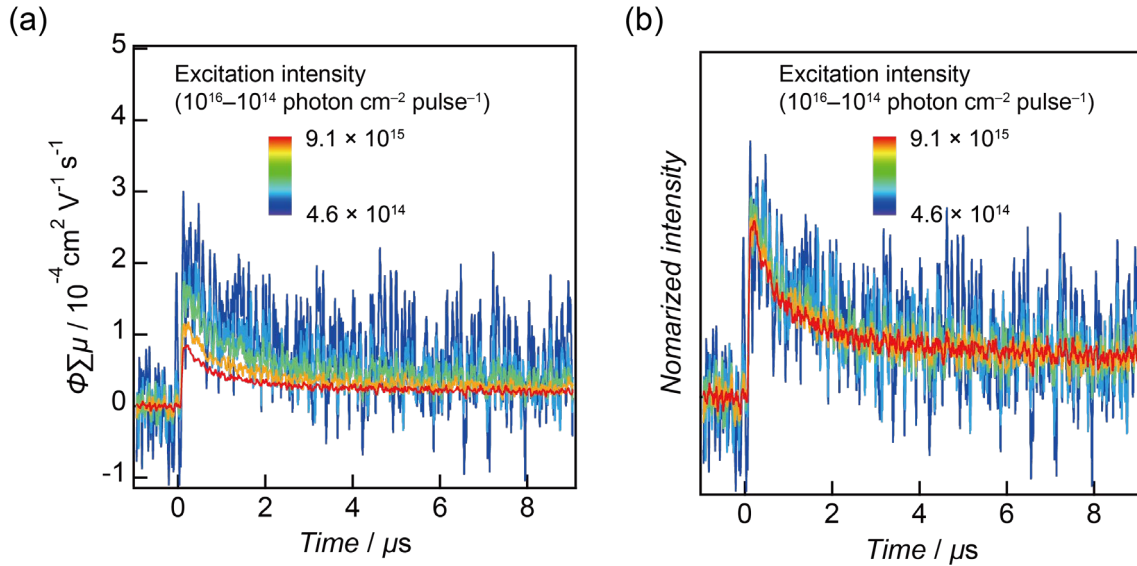**Fig. S9.** (a) Excitation intensity dependence of TRMC experiments for **KGF-24**. (b) Normalized results.

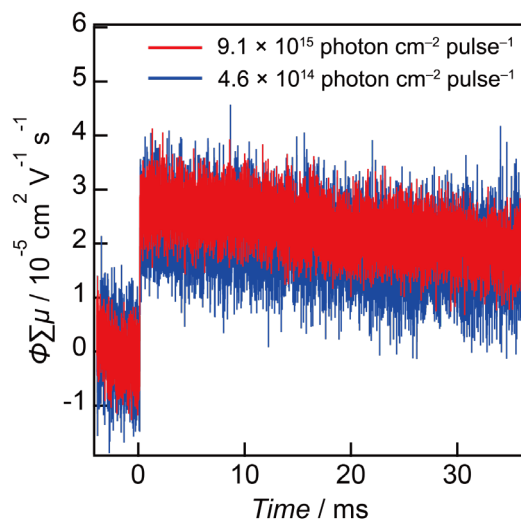

**Fig. S10.** Excitation intensity dependence of TRMC experiments for **KGF-25**.

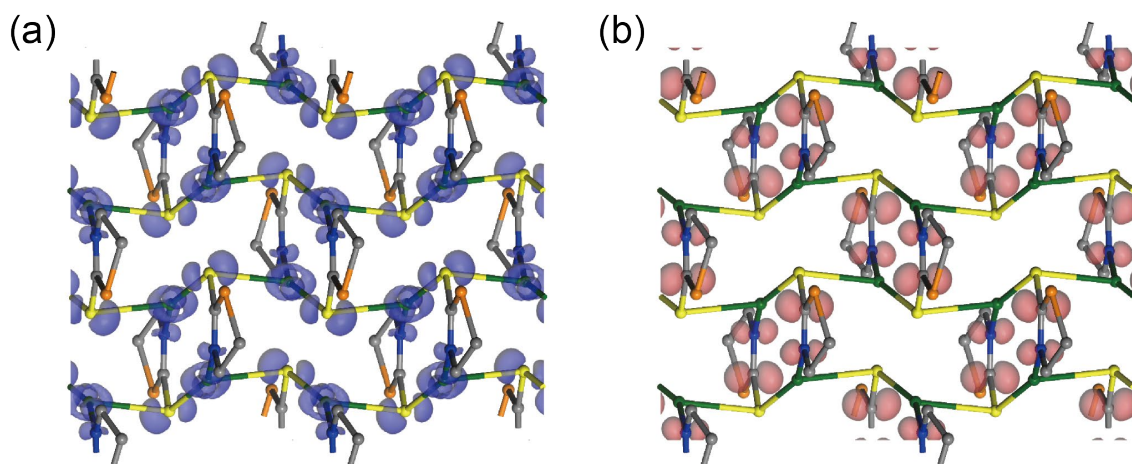

**Fig. S11.** Distribution of (a) VBM and (b) CBM for **KGF-24**. H atoms are omitted for clarity.

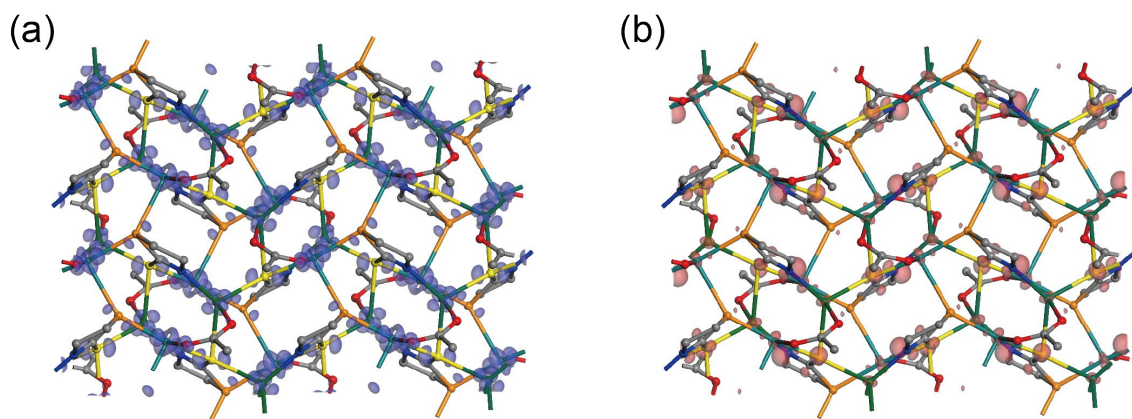

**Fig. S12.** Distribution of (a) VBM and (b) CBM for **KGF-25**. H and F atoms are omitted for clarity.

## References

- S1. G. M. Sheldrick, *Acta Cryst.*, 2008, **A64**, 112–122.
- S2. G. M. Sheldrick, *Acta Cryst.*, 2015, **C71**, 3–8.
- S3. O. V. Dolomanov, L. J. Bourhis, R. J. Gildea, J. A. K. Howard and H. Puschmann, *J. Appl. Cryst.*, 2009, **42**, 339–341.
- S4. Y. Kamakura, P. Chinapang, S. Masaoka, A. Saeki, K. Ogasawara, S. R. Nishitani, H. Yoshikawa, T. Katayama, N. Tamai, K. Sugimoto and D. Tanaka, *J. Am. Chem. Soc.*, 2020, **142**, 27–32.
- S5. Y. Kamakura, C. Sakura, A. Saeki, S. Masaoka, A. Fukui, D. Kiriya, K. Ogasawara, H. Yoshikawa and D. Tanaka, *Inorg. Chem.*, 2021, **60**, 5436–5441.
- S6. Y. Kamakura, S. Fujisawa, K. Takahashi, H. Toshima, Y. Nakatani, H. Yoshikawa, A. Saeki, K. Ogasawara and D. Tanaka, *Inorg. Chem.*, 2021, **60**, 12691–12695.
- S7. T. Wakiya, Y. Kamakura, H. Shibahara, K. Ogasawara, A. Saeki, R. Nishikubo, A. Inokuchi, H. Yoshikawa and D. Tanaka, *Angew. Chem. Int. Ed.*, 2022, **61**, e202203151.
- S8. T. C. Narayan, T. Miyakai, S. Seki and M. Dinca, *J. Am. Chem. Soc.*, 2012, **134**, 12932–12935.
- S9. T. Okubo, H. Anma, N. Tanaka, K. Himoto, S. Seki, A. Saeki, M. Maekawa and T. Kuroda-Sowa, *Chem. Commun.*, 2013, **49**, 4316–4318.
- S10. L. Sun, T. Miyakai, S. Seki and M. Dinca, *J. Am. Chem. Soc.*, 2013, **135**, 8185–8188.
